# Supplementary material
Source: PubMed Central journal article supplement (PMC3124246)

**Supporting Information**

**Synthesis and Neurotoxicity Profile of 2,4,5-Trihydroxymethamphetamine and its 6-(*N*-Acetylcystein-*S*-yl) Conjugate**

Anne Neudörffer,<sup>†</sup> Melanie Mueller,<sup>‡</sup> Claire-Marie Martinez,<sup>†</sup> Annis Mehan,<sup>‡</sup> Una McCann,<sup>§</sup>  
George A. Ricaurte<sup>\*‡</sup> and Martine Langeron<sup>\*†</sup>

<sup>†</sup>*UMR 8638 CNRS - Université Paris Descartes, Synthèse et Structure de Molécules d'Intérêt Pharmacologique, Faculté des Sciences Pharmaceutiques et Biologiques, 4 Avenue de l'Observatoire, 75270 Paris cedex 06, France,* <sup>‡</sup>*Department of Neurology and* <sup>§</sup>*Department of Psychiatry and Behavioral Sciences, Johns Hopkins University School of Medicine, 5501 Hopkins Bayview Circle, Baltimore, Maryland 21224*

E-mail: [martine.langeron@parisdescartes.fr](mailto:martine.langeron@parisdescartes.fr) (M.L.); [ricaurte@jhmi.edu](mailto:ricaurte@jhmi.edu) (G.A.R.)

**Table of Contents**

- I. <sup>1</sup>H and <sup>13</sup>C NMR spectra of THMA **4** and its synthetic intermediates, together with 6-(*N*-acetylcystein-*S*-yl)-THMA **5**
- II. Analytical HPLC chromatograms of THMA **4** and of 6-(*N*-acetylcystein-*S*-yl)-THMA **5**

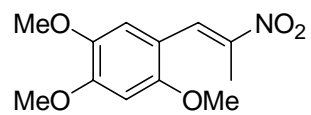

DMSO D6

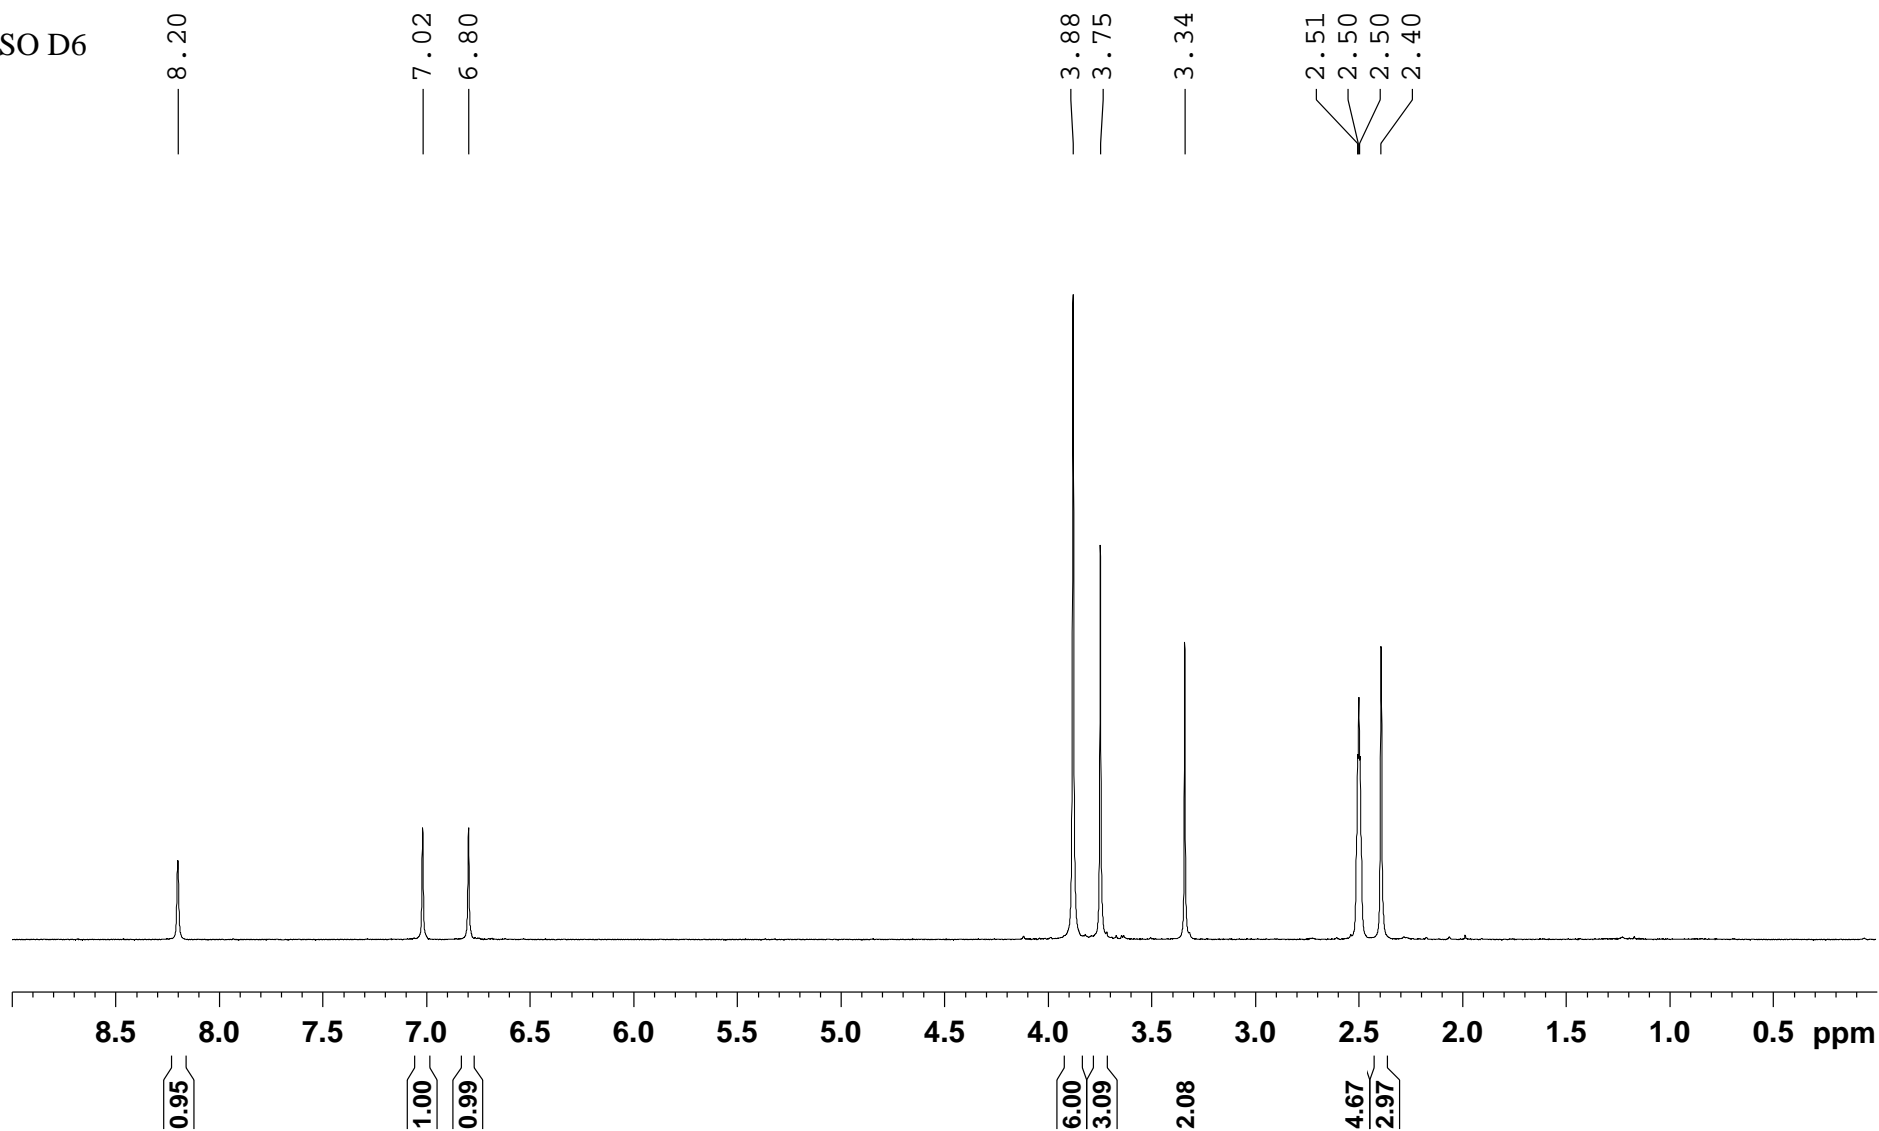

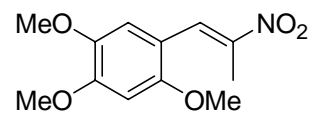

DMSO D6

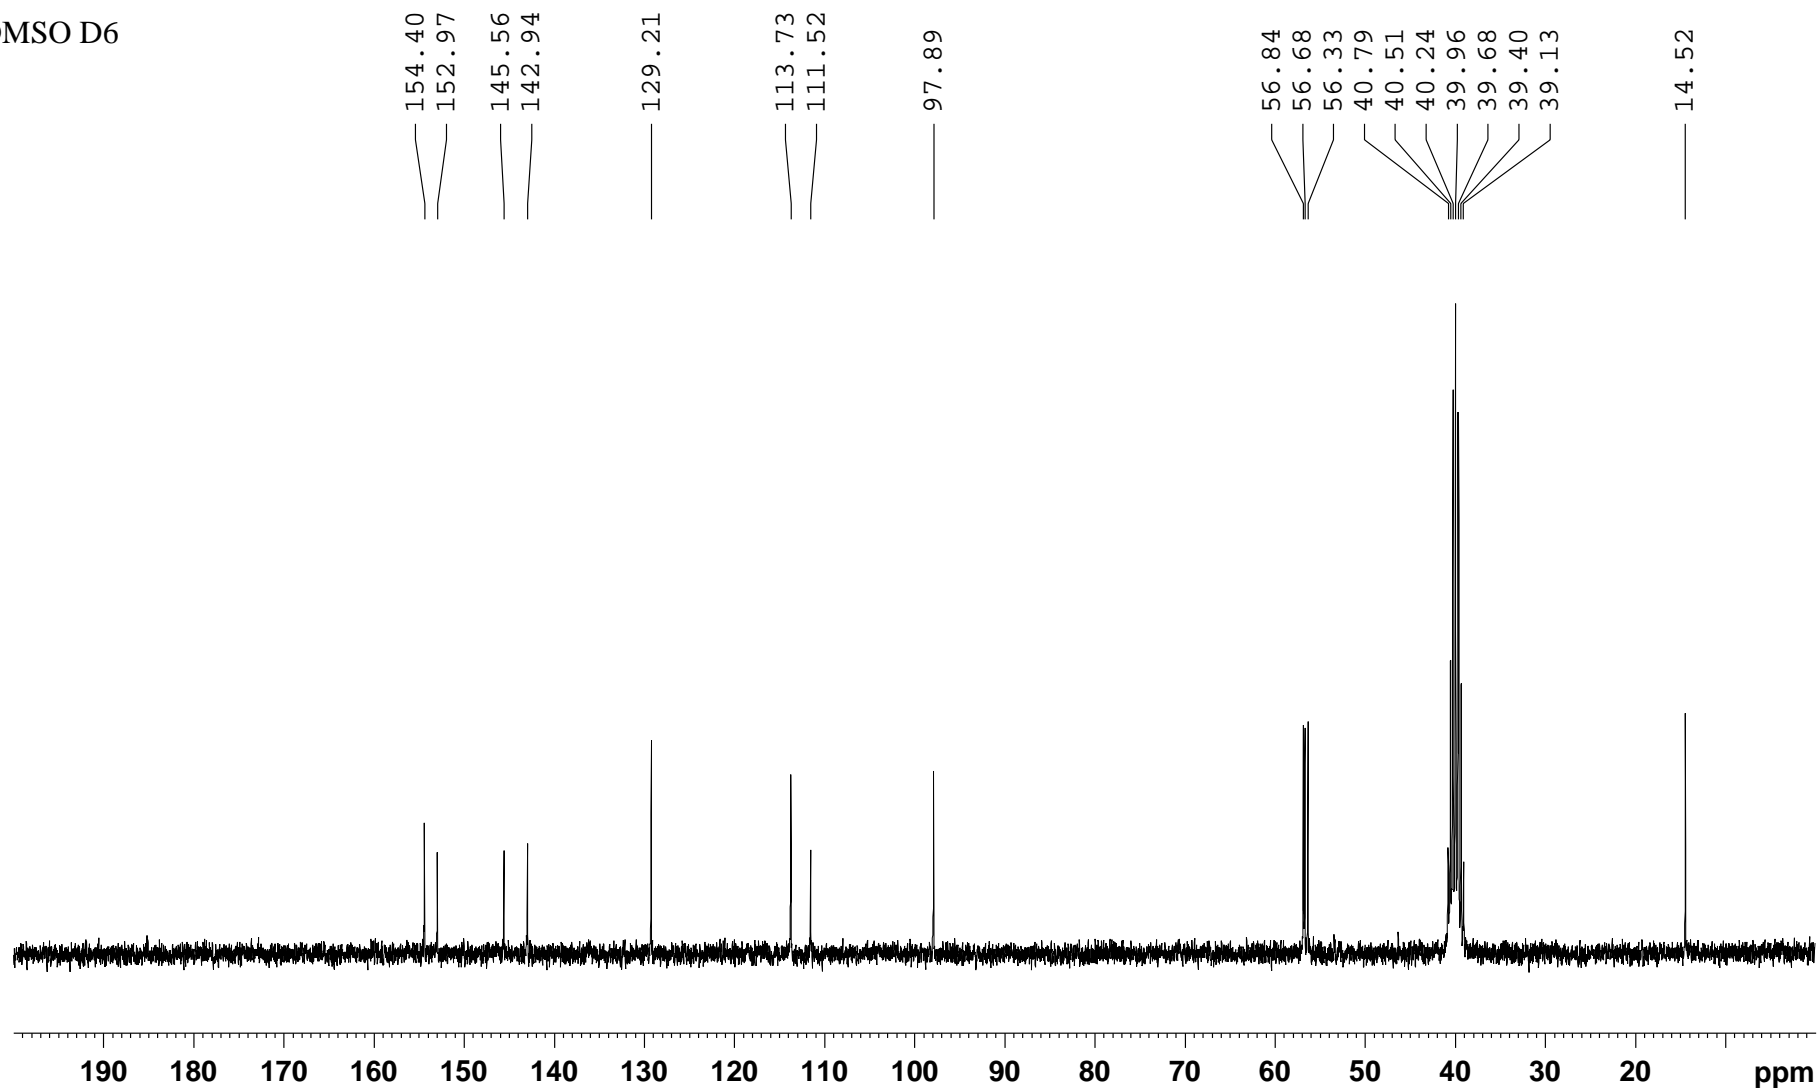

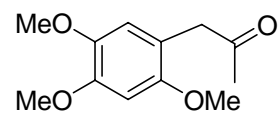

CDCl<sub>3</sub>

6.68  
6.55

3.91  
3.84  
3.81  
3.63

2.15

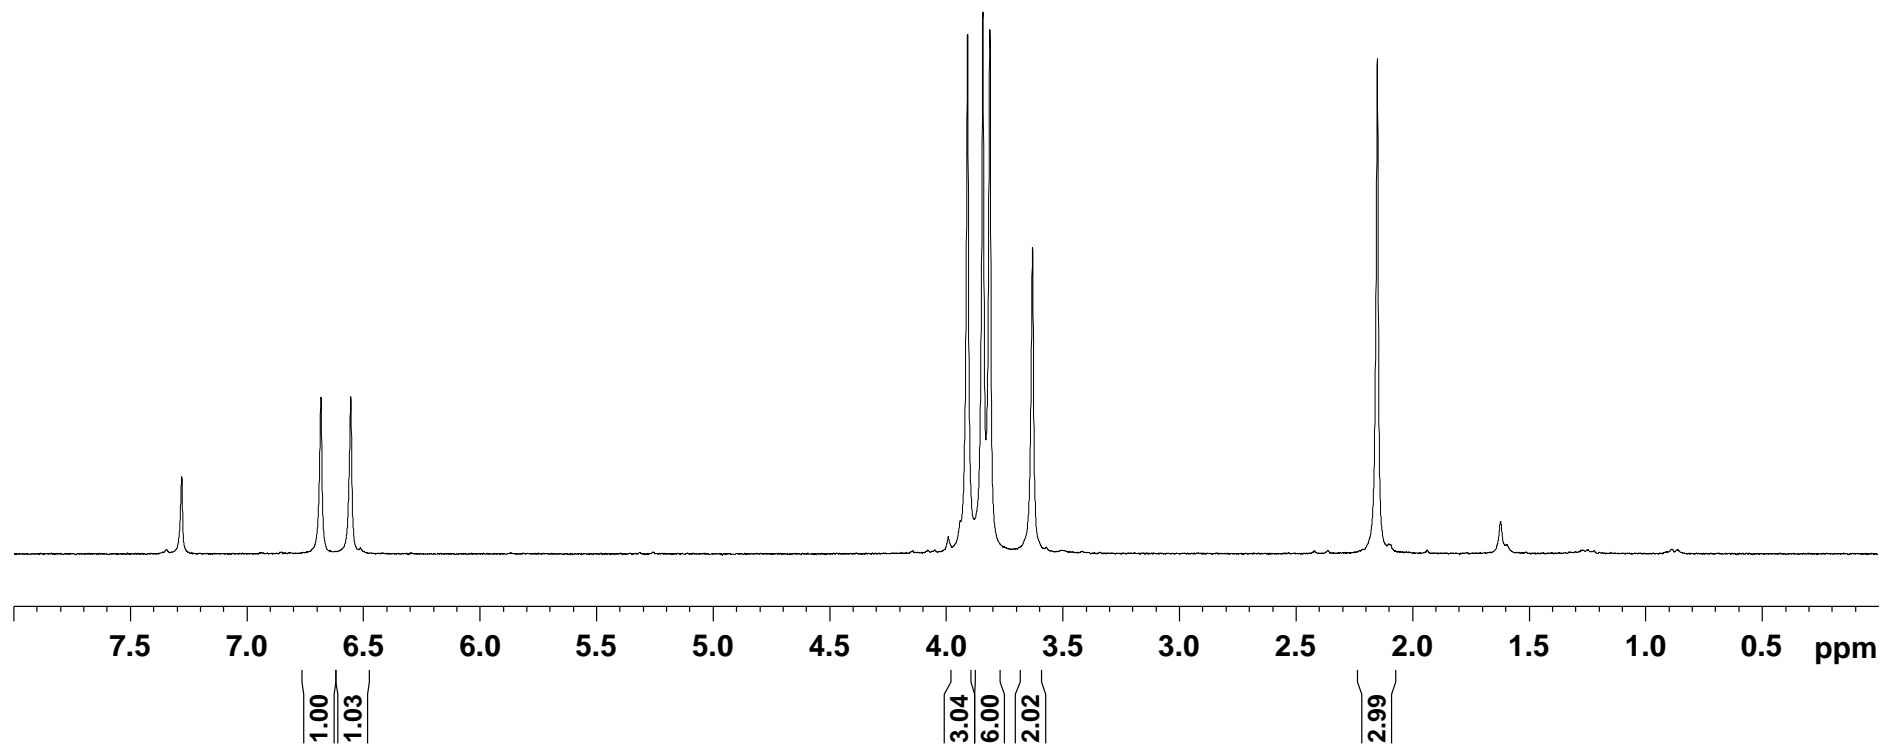

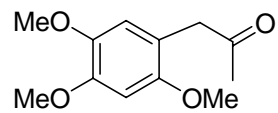

CDCl<sub>3</sub>

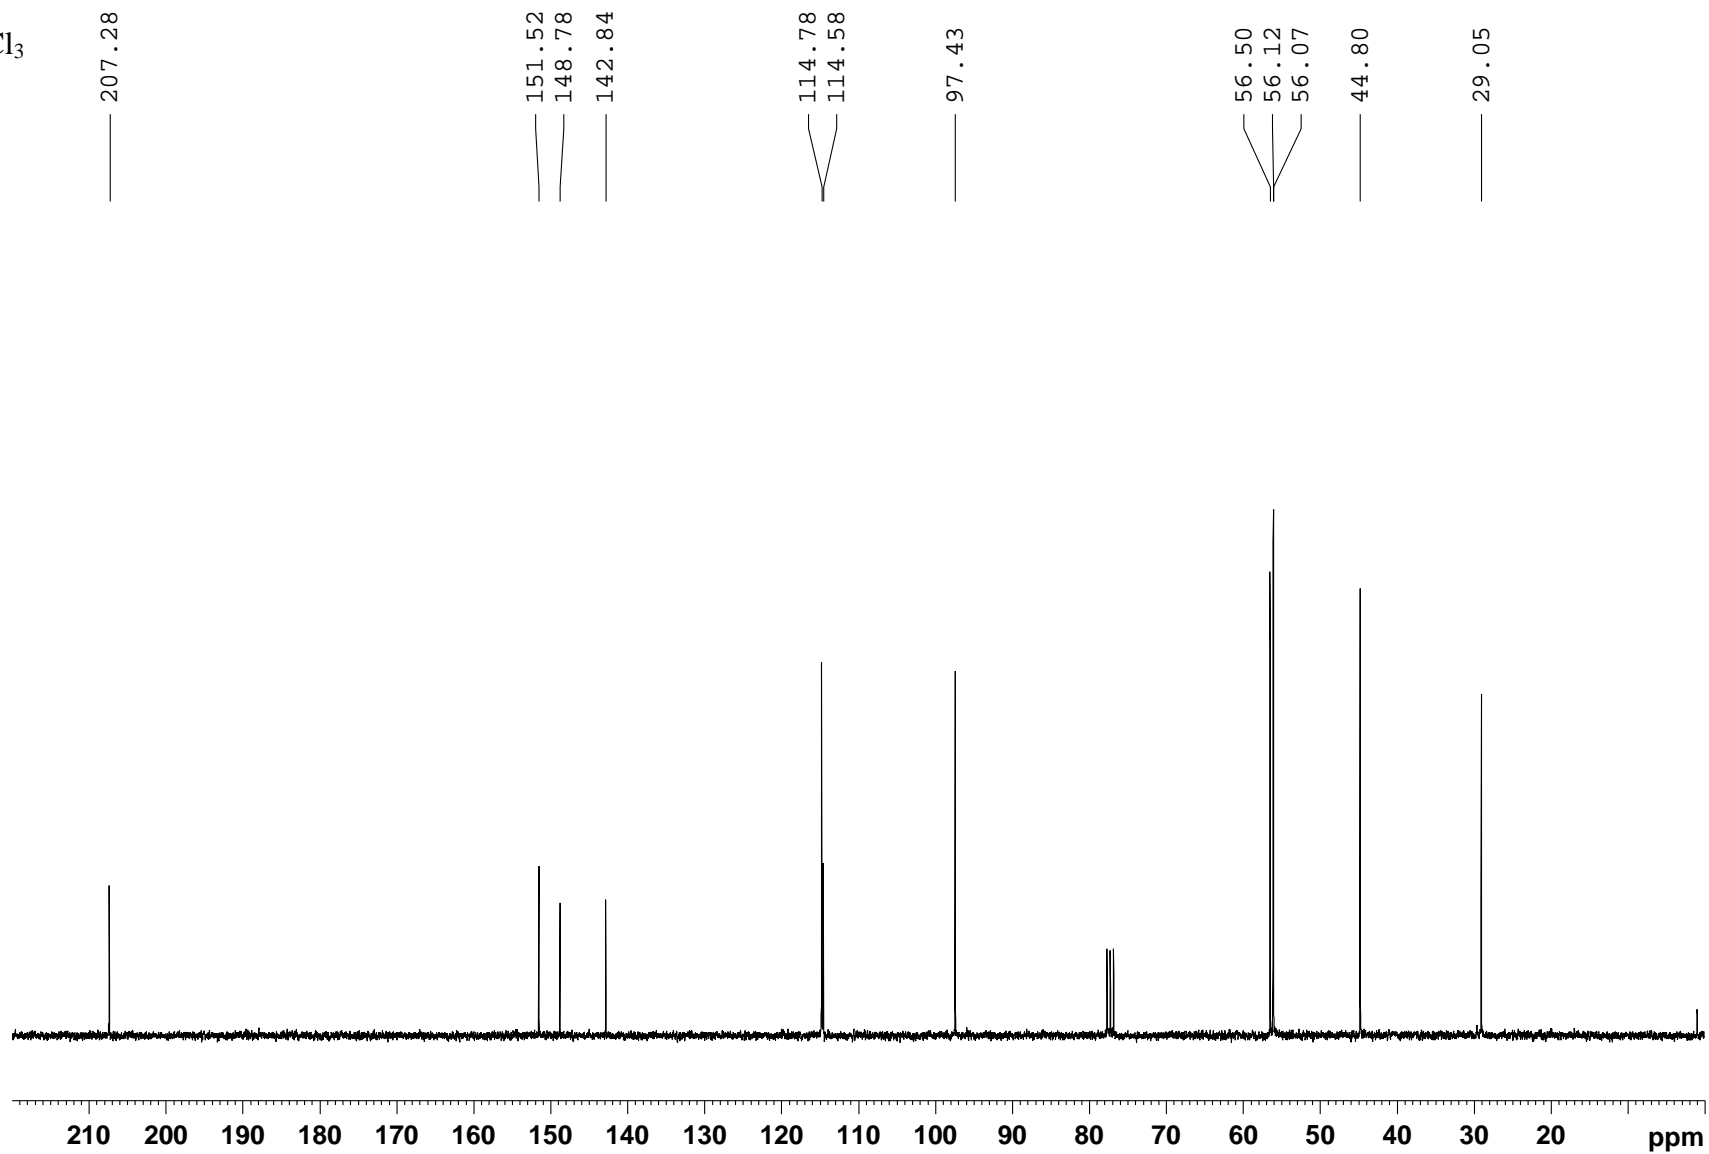

S5

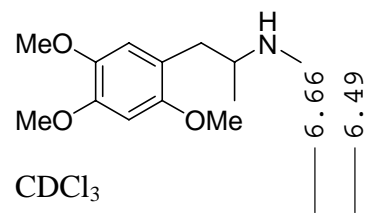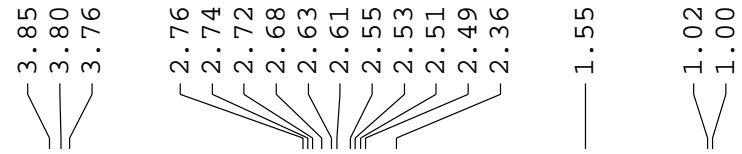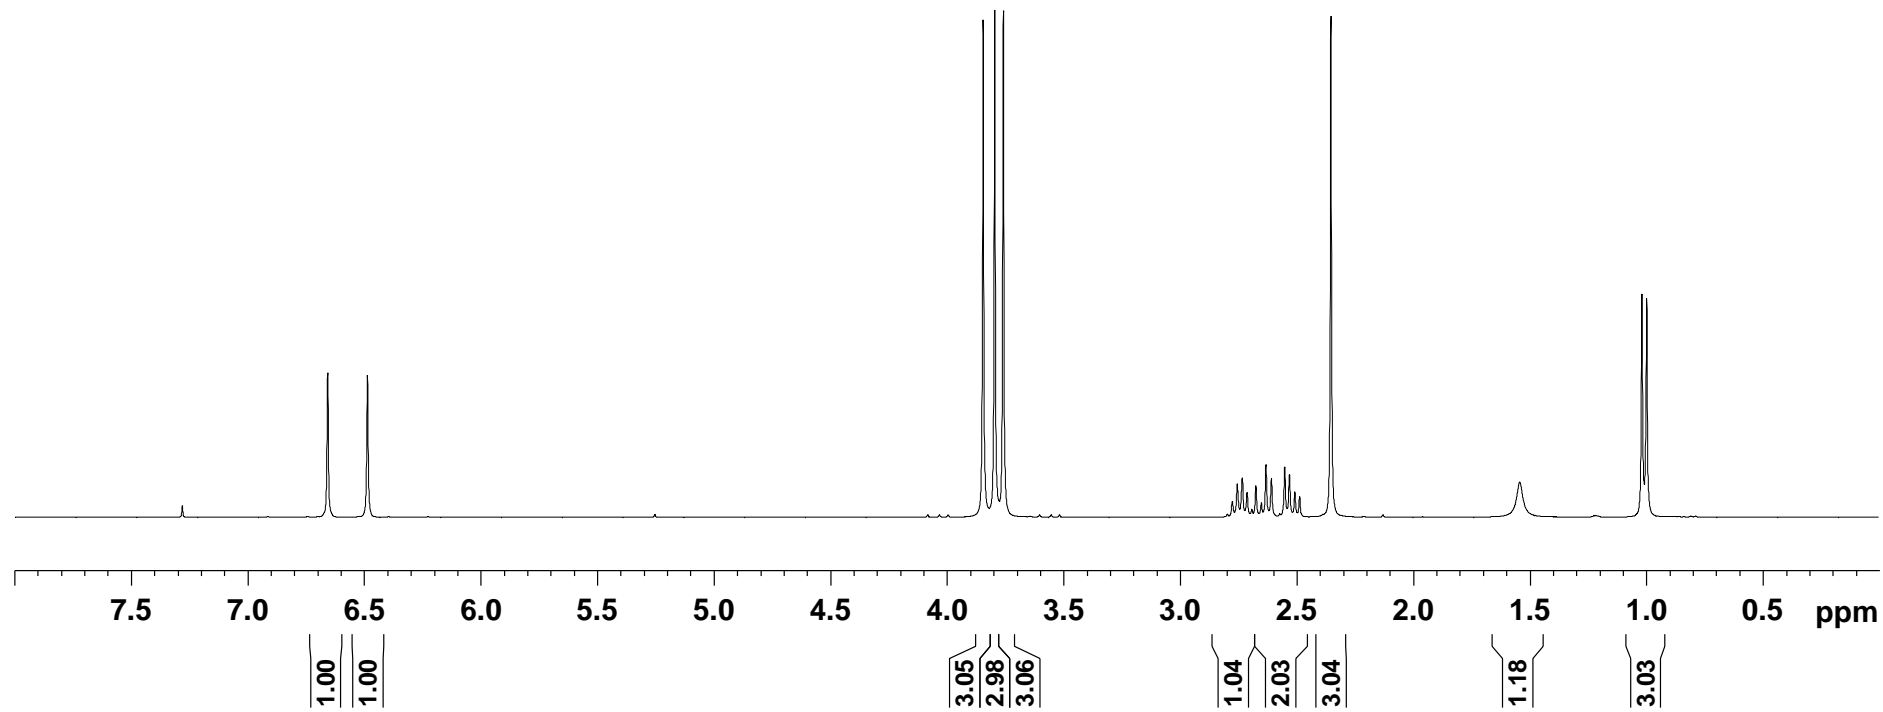

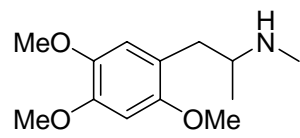

CDCl<sub>3</sub>

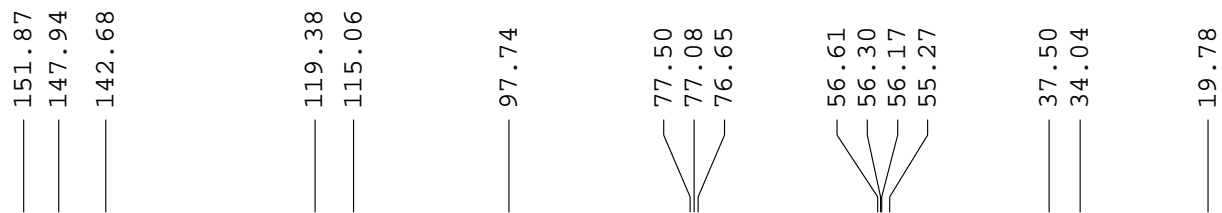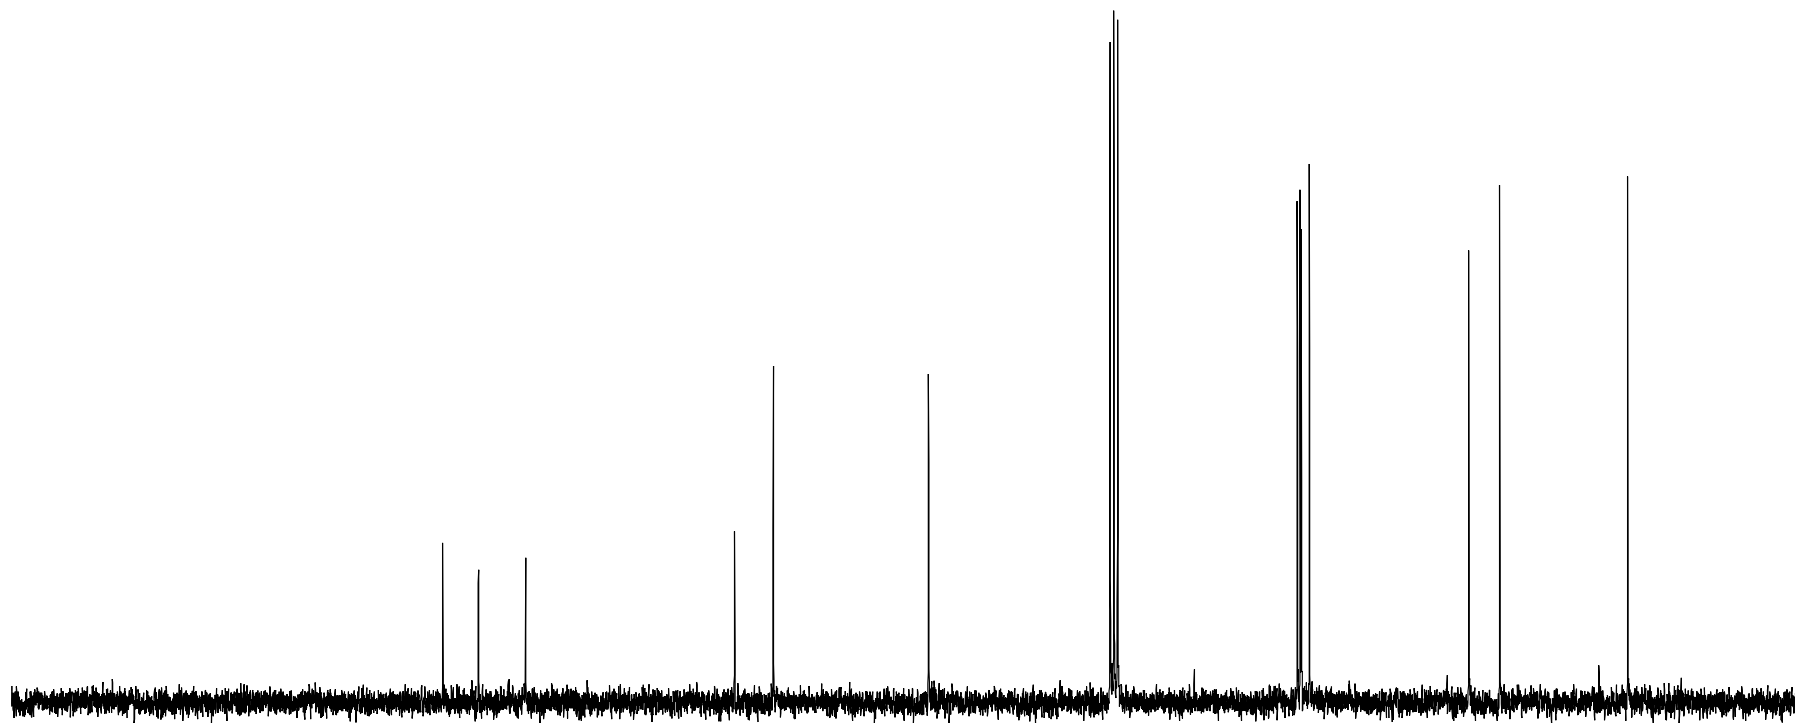

190 180 170 160 150 140 130 120 110 100 90 80 70 60 50 40 30 20 ppm

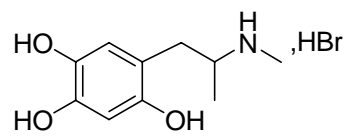

D<sub>2</sub>O

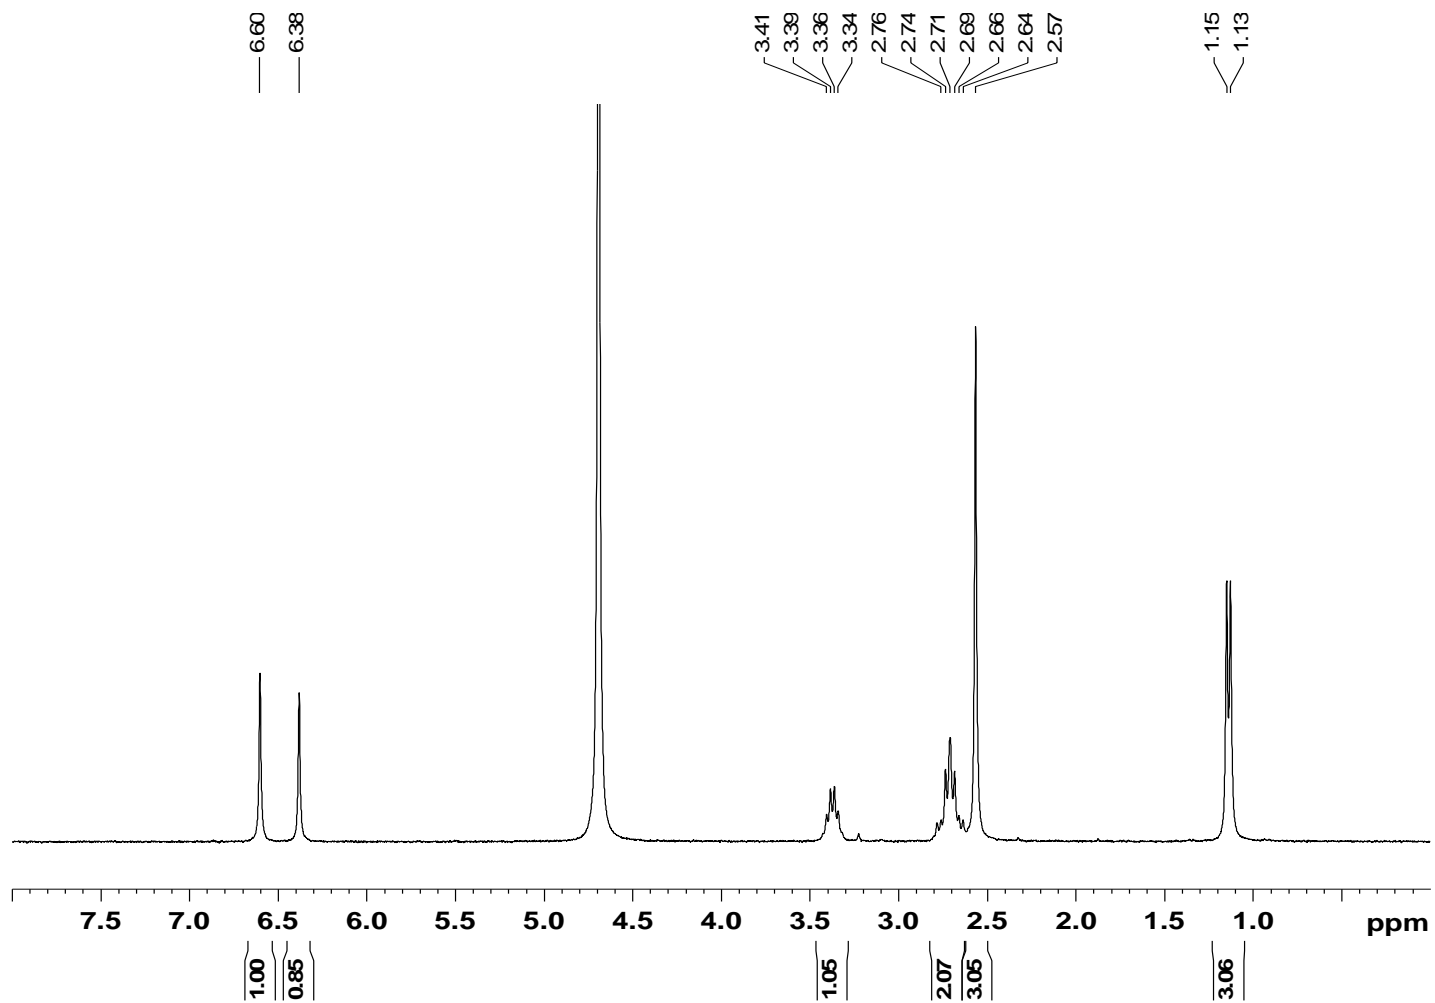



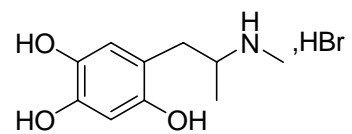

D<sub>2</sub>O

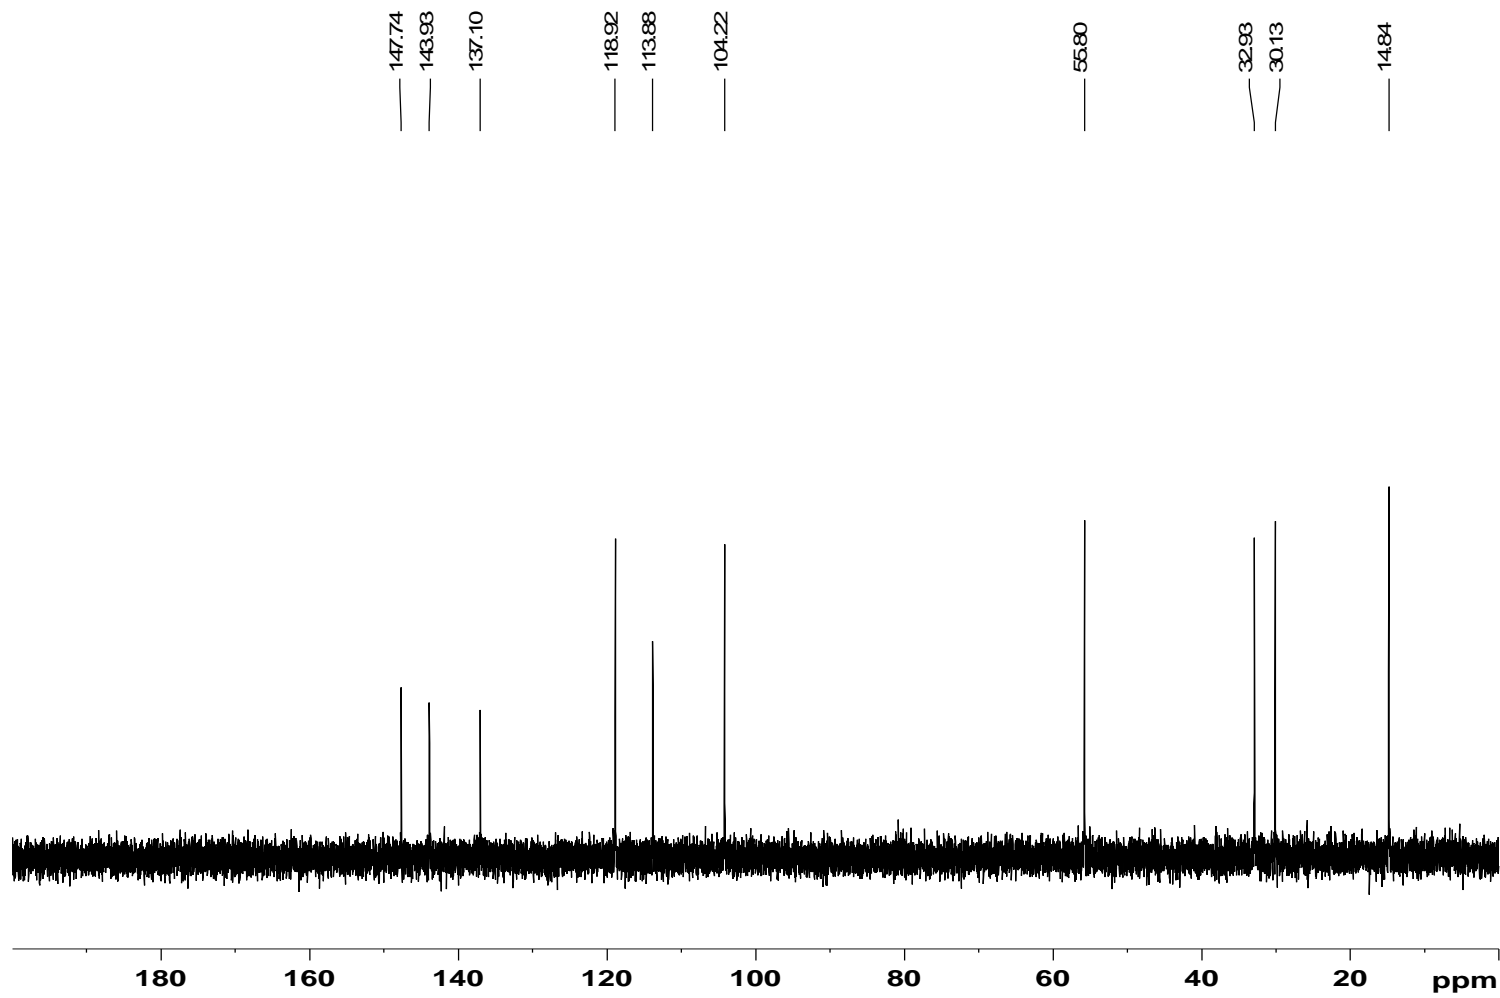

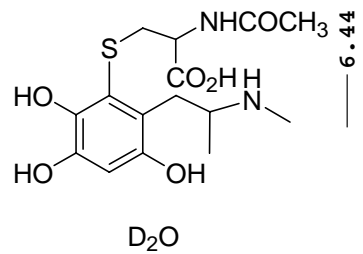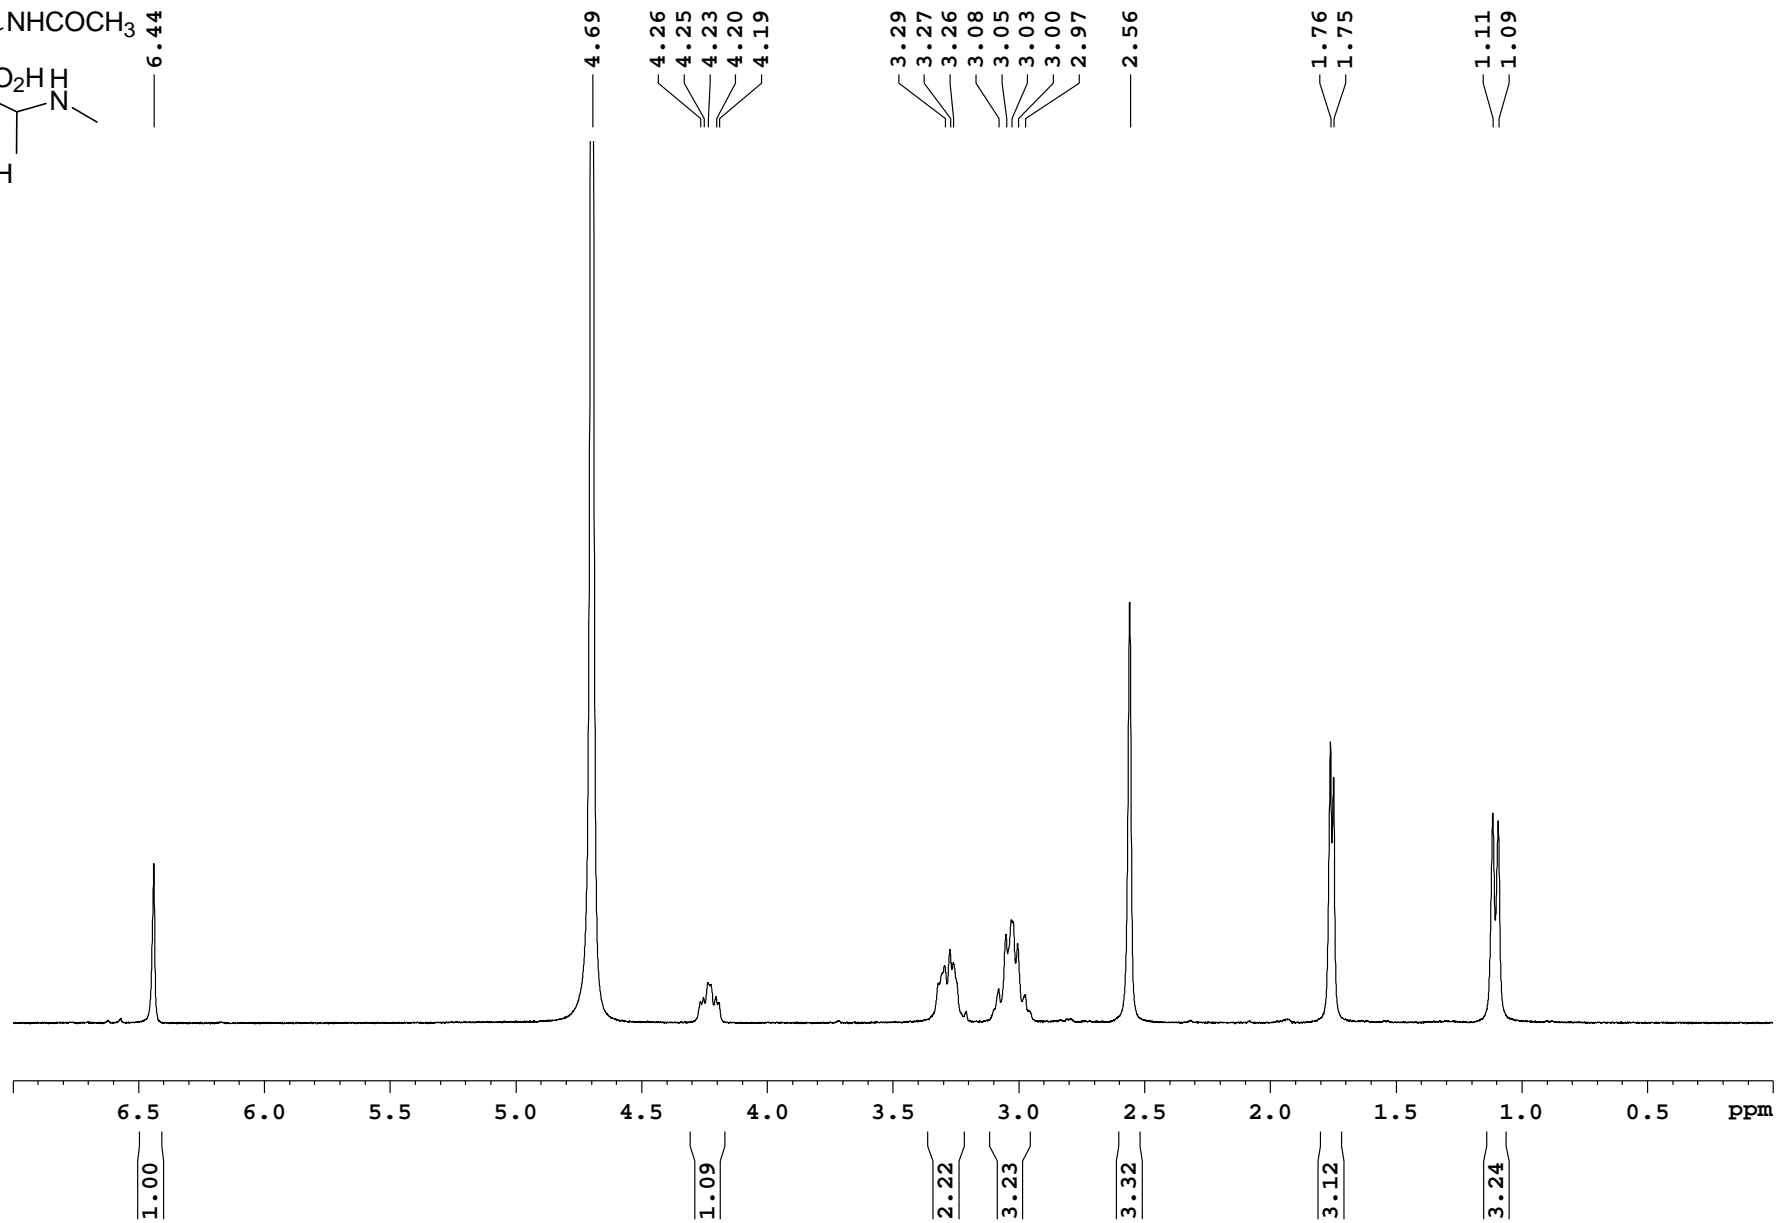

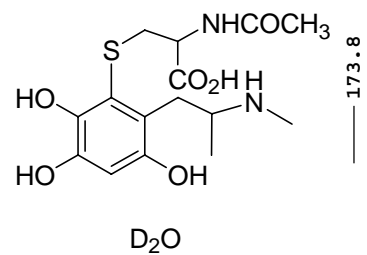

147.9  
147.9  
143.9  
139.9

120.4  
120.3  
117.7  
117.6

105.2

56.4  
53.4  
53.2

34.5  
31.2  
31.1  
30.2  
30.2

21.4

14.8

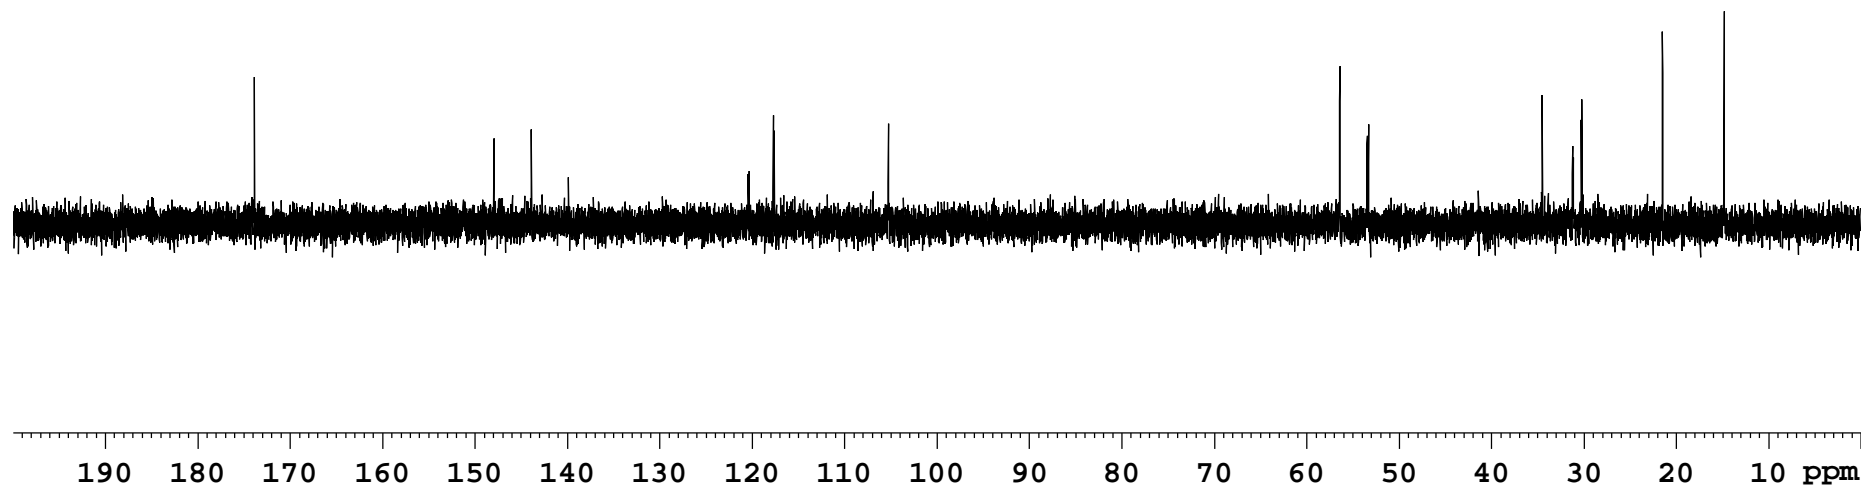

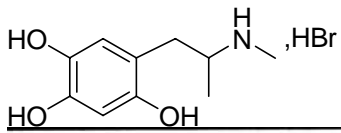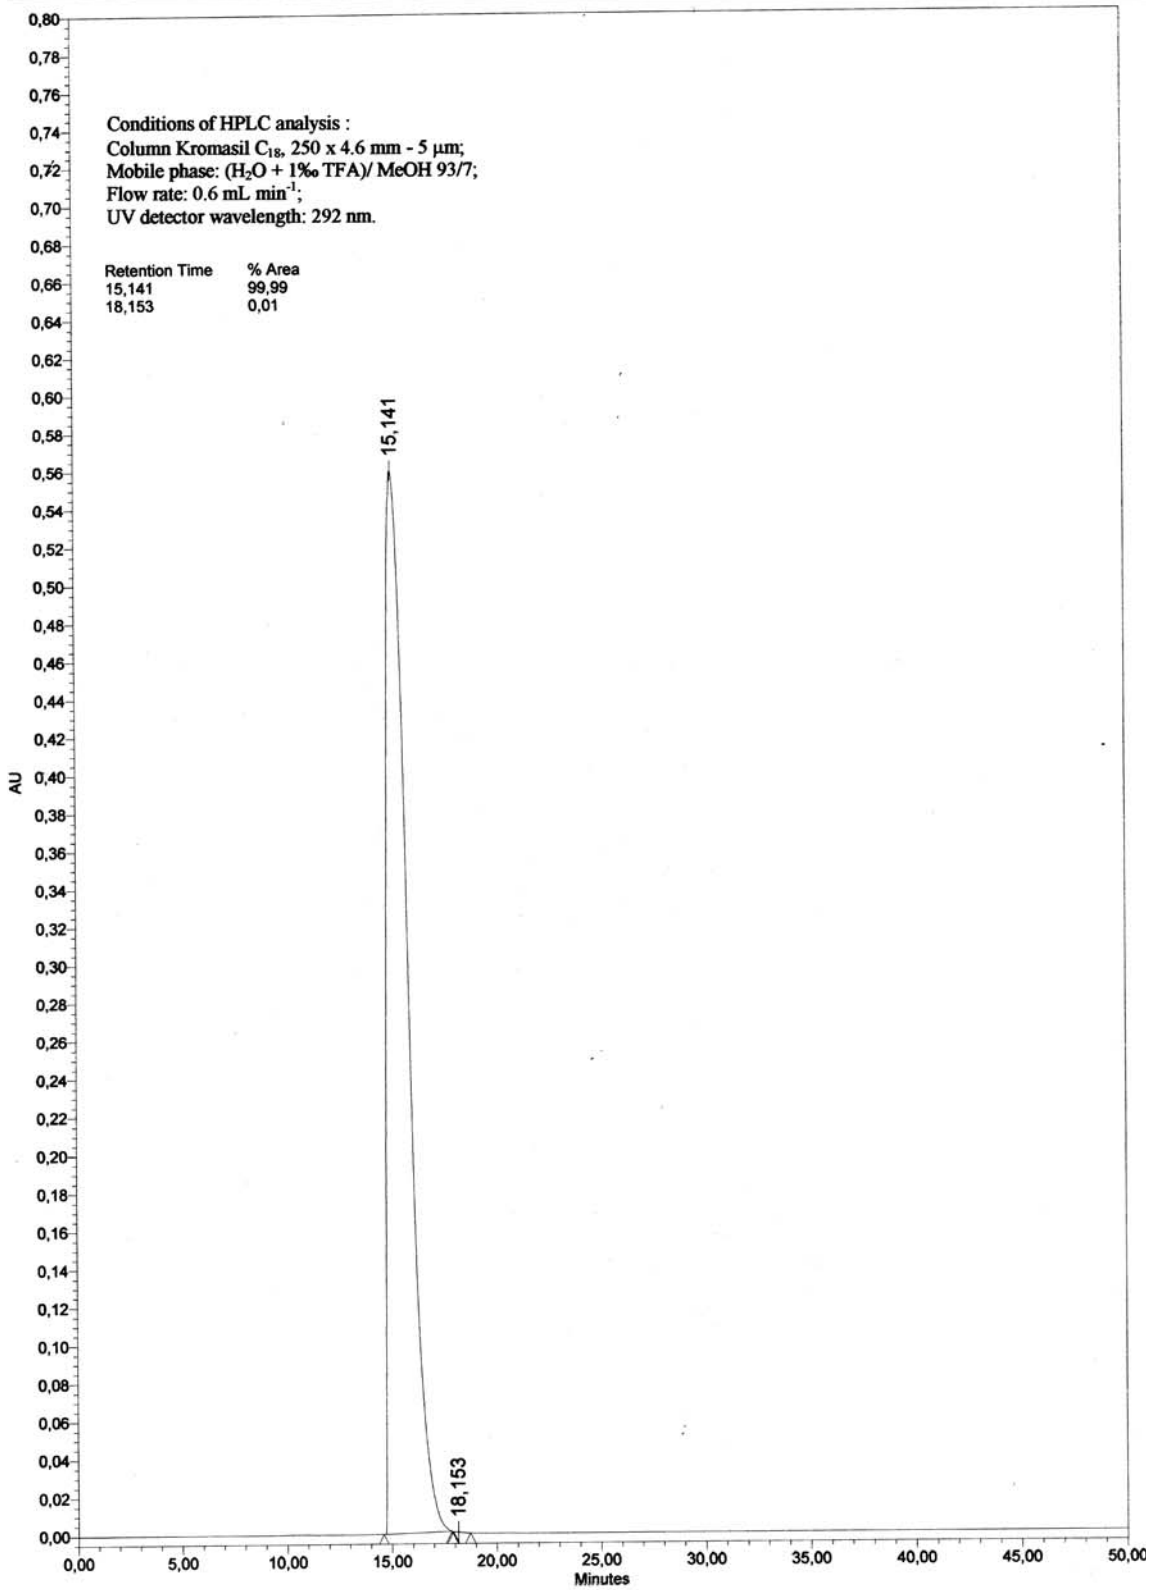

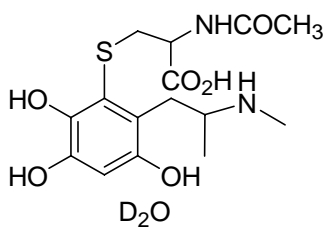

After the first semipreparative reversed-phase HPLC (96.5 % purity grade)

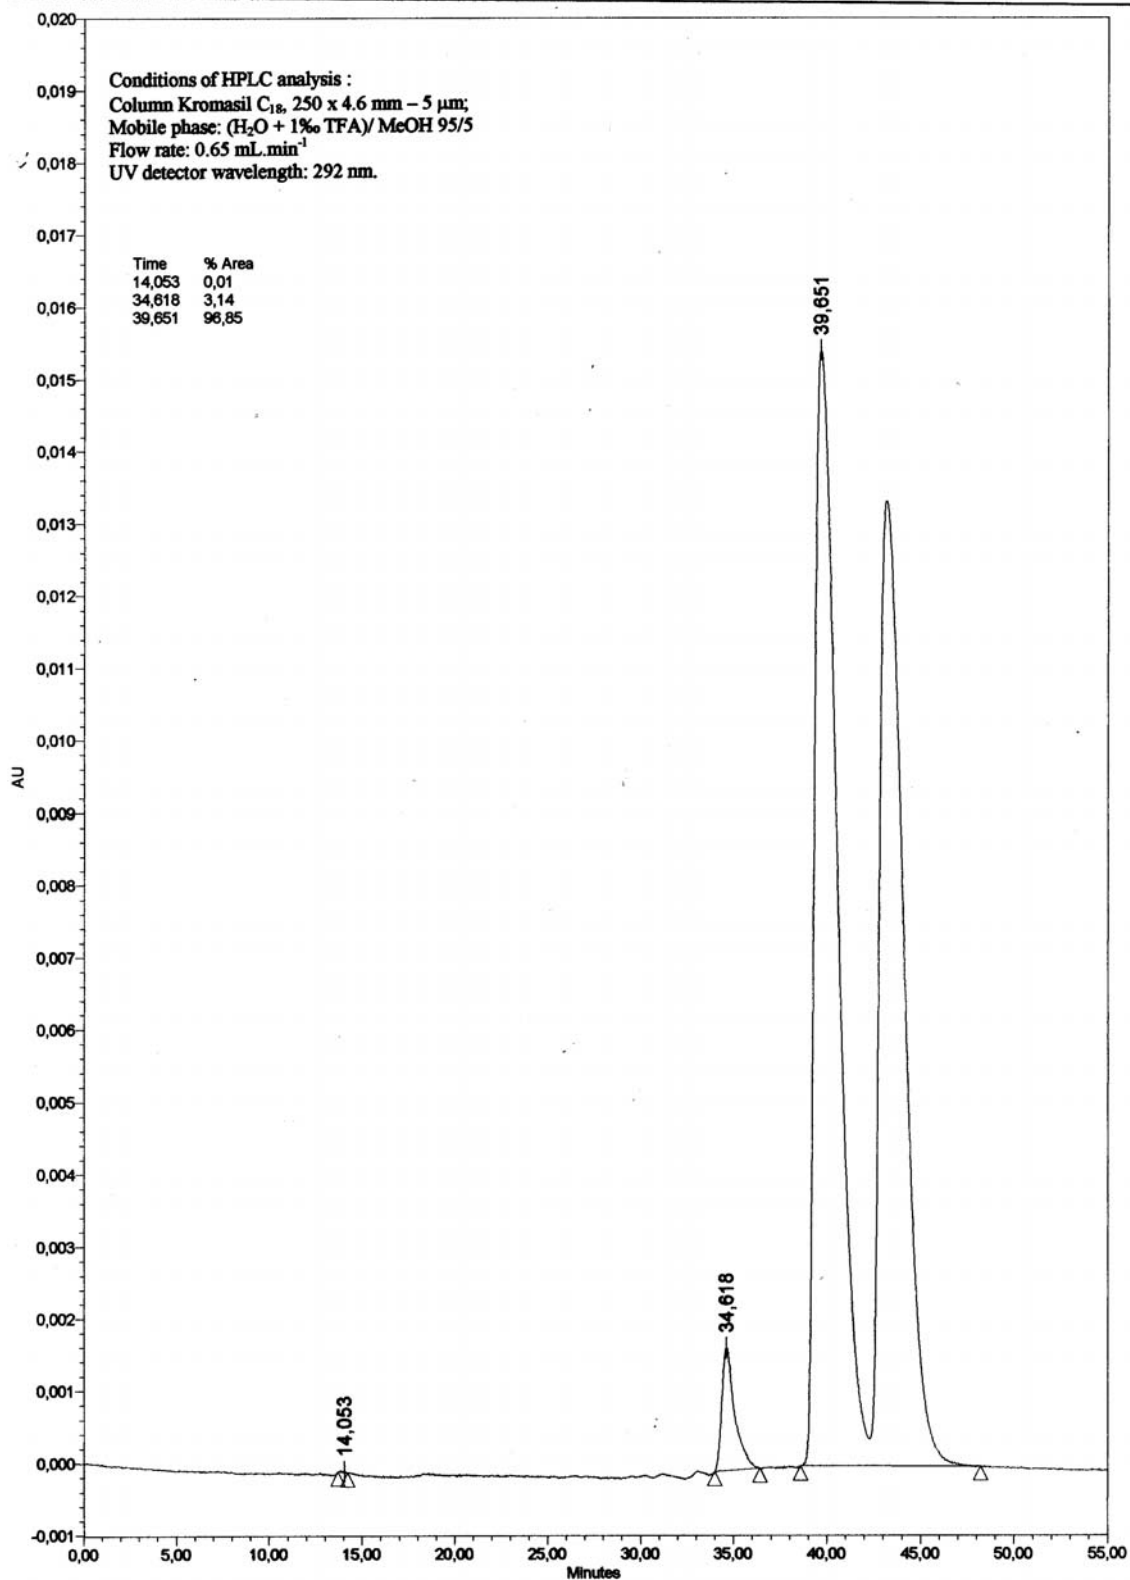

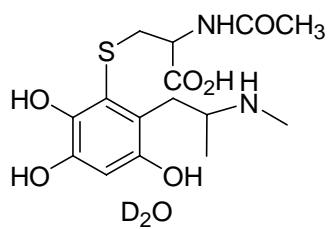

After the second semipreparative reversed-phase HPLC (99.5% purity grade)

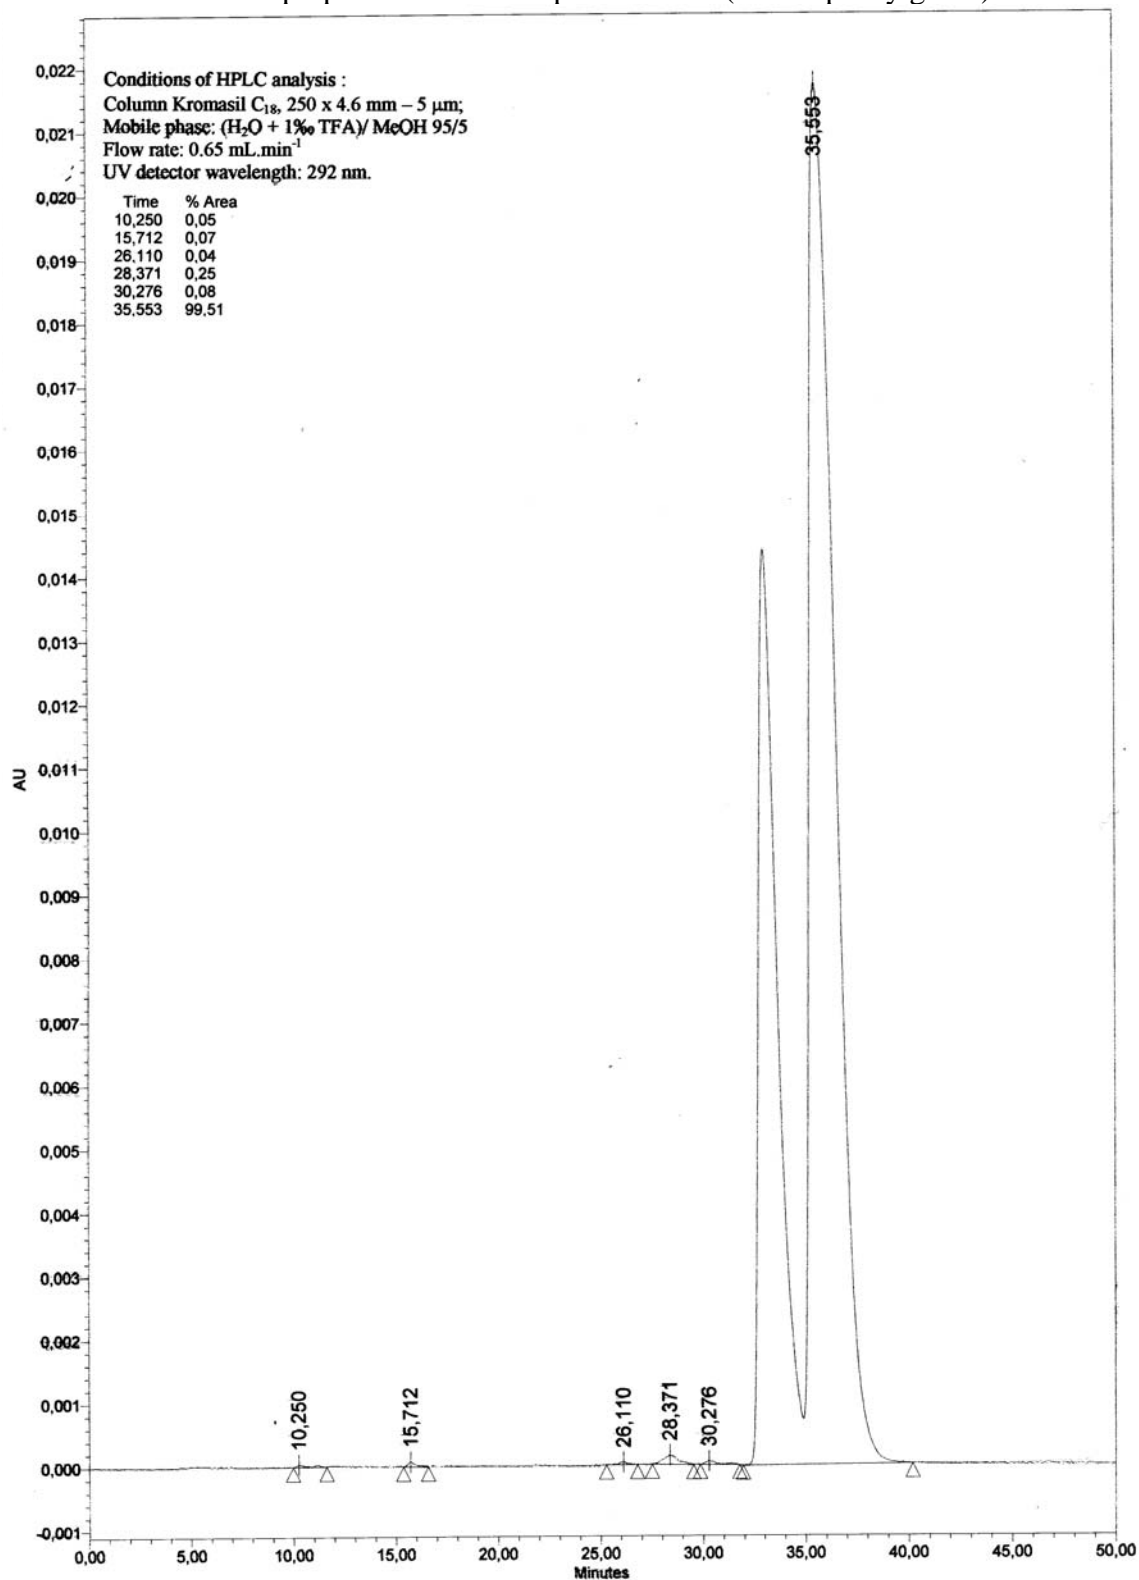

Supplement: NIHMS297872-supplement-1_si_001.pdf [file NIHMS297872-supplement-1_si_001.pdf]
